# Supplementary material for: Amino acid starvation sensing dampens IL-1β production by activating riboclustering and autophagy
Source: PLoS Biol. 2018 Apr 5;16(4):e2005317. doi: 10.1371/journal.pbio.2005317 (PMC5903674; doi:10.1371/journal.pbio.2005317)
Supplement: S1 Data — (XLSX) [file pbio.2005317.s014.xlsx]

## Sheet: Fig-1A
Media	HF (5)	HF (10)	HF (20)	LPS+ATP	LPS+ATP+HF(5)	LPS+ATP+HF (10)	LPS+ATP+HF (20)
30	90	60	90	1345.5	792	558	326.5
50	70	89.5	110	1220	790	556.5	330

## Sheet: Fig-1B
Media	LPS+ATP	LPS+ATP+HF (5)	LPS+ATP+HF (10)	LPS+ATP+HF(20)	LPS+ATP+MAZ1310 (5)	LPS+ATP+MAZ1310 (10)	LPS+ATP+MAZ1310 (20)
0	1408	680	507	200	1356	1242	1278
0.1	1366	554	389	278	1122	1266	990
				333

## Sheet: Fig-1C
Media	MSU	MSU+HF	ALU	ALU+HF	Salmonella	Salmonella+HF
133.5	2035.5	635	1536	30	1724	130
-30	1853.5	438.5	1411	58.5	1268	158.5
12.5	1617	353.5	1175.5	20.5	1053	90.5

## Sheet: Fig-1F
Media	LPS	LPS+HF
0.0612138	0.25	0.146604
0.0674518	0.287175	0.154964

## Sheet: Fig-1G
Media	LPS	LPS+HF
0.00157547	0.0656073	0.0733022
0.000983355	0.0871715	0.0877778

## Sheet: Fig-1H
Media	HF	LPS	LPS+HF	LPS+Act-D	LPS+Act-D+HF	Act-D
0.0626677	0.0456677	1.47427	0.476319	0.271684	0.170755	0.00126677
0.000484908	0.000684908	1.55833	0.441352	0.285191	0.157127	0.00148491

## Sheet: Fig-2C
Media	HF
2	14
4	31
3	51
3	72
4	30
5	18
0	10
0
0
0
0
4
4

## Sheet: Fig-2E
WT	GCN2-/-	WT	GCN2-/-
Media	Media	HF	HF
0	0	6	4
0	0	8	3
0	0	3	0
0	0	3	0
0	0	8	0
0	0	10	2
0	2	11	4
3	0	8	0
0	3	11	3
0	0	11	1
0	0	10	0
0	0	7	0
3	3	5	0
0	0	11	3
0		8	5
0		14	4
0		11	1
0		10	1
1		14	3
2		20	4
		18	0
		13	0
		7	0
		11	0
		17	0
		11	7
		8	0
		13	4
		6	5
		8	2
		10	2

## Sheet: Fig-2F
WT Media	GCN2-/-Media	WT LPS+ATP	GCN2-/- LPS+ATP	WT LPS+ATP+HF	GCN2-/- LPS+ATP+HF
27.6667	0	685.333	1055.67	42	1066.67
68	0	837.333	1321	126.333	908.667
	37.6667	859.333		68.6667

## Sheet: Fig-2G
WT Media	GCN2-/-Media	WT LPS+ATP	GCN2-/- LPS+ATP	WT LPS+ATP+HF	GCN2-/- LPS+ATP+HF
0	0	1493.33	1554	874	1512.33
0	0	1744	1658	1008	1739.33
0	0	1587.33	1526.67	1013.33	1693.67

[truncated: 39 more sheets: Fig-3B, Fig-3F, Fig-3G, Fig-4B, Fig-4E, Fig-4G, Fig-4H, Fig-4I, Fig-4J, Fig-4K, Fig-4L, Fig-5C, Fig-6A, Fig-6B, Fig-6E, Fig-6H, Fig-S1, Fig-S2A, Fig-S2B, Fig-S2C …]
